# Supplementary material
Source: publisher site journal article supplement (https://www.dovepress.com/article/375405)
Supplement: Supplementary file 1 [file get_supplementary_file.php]

**Supplement 1. Telephone survey assessing eye rubbing, parental understanding of keratoconus, and socioeconomic background**

| *First, we have a series of questions about your child’s eye rubbing.* | |
| --- | --- |
| Does your child rub their eyes? | - Yes - No, but they did in the past - Never |
| How much pressure do they apply when they rub their eyes? | - Light - Medium - Hard |
| *Next, we have some questions about your current understanding of keratoconus, as the parent of a child with this condition.* | |
| Have you been told your child has a diagnosis of keratoconus? | - Yes - No |
| What is your current level of understanding about keratoconus, including what it is and what causes it? | - Excellent - Good - Fair - Poor - Very poor |
| Have you been told how to prevent keratoconus progression? | - Yes - No |
| *Now, thinking back to when your child was first diagnosed with keratoconus, we will ask you the same questions again.* | |
| When your child was first diagnosed with keratoconus, what was your level of understanding about keratoconus, including what it is and what causes it? | - Excellent - Good - Fair - Poor - Very poor |
| Were you told how to prevent keratoconus progression? | - Yes - No |
| *Lastly, we have a few demographic questions. Some of these questions may seem personal, but please be assured your names will not be associated with these responses. You can decline any question you do not wish to answer.* | |
| What is the highest level of education attained by anyone in your household? | - Less than high school - High school - Some college - Bachelor’s degree - Graduate degree |
| Do you have reliable transportation to UCSF for visits related to your child’s keratoconus? | - Excellent - Good - Fair - Poor - Very poor |
| How long does it take you to get to UCSF for visits related to your child’s keratoconus? | - Less than 30 minutes - 30-60 minutes - 1-3 hours - 3 hours or more |
| What range is your annual household income? | - Less than $25,000 - $25,000-50,000 |
|  | - $50,000-100,000 - $100,000-150,000 - $150,000-200,000 - More than $200,000 |

**Supplement 2. Semi-structured in-depth interviews to explore barriers to parental understanding of keratoconus**

| *Prompt 1: You described your understanding of keratoconus as poor. Can you elaborate on this?*  *E.g., what do you know? What do you wish you knew?* |
| --- |
| “The doctor told me the shape was not like a regular eye, it is closing in like a V shape which is affecting the cells in his eye and his vision.”  “I know the eye is shaped like a football, which affects the vision.”  “They told me he needs to wear the lens or the eye can burst.”  “I know what the doctors have told me which is that the eye is like a cone that is big inside and small in front.”  “I would like to know the exact cause.”  “I don’t understand why my son got this, I know he rubs his eyes but I don’t know the exact cause.” |
| *Prompt 2: When your child was diagnosed with keratoconus, how much did the doctor speak with you about the diagnosis?*  *E.g., did they discuss what causes it and makes it worse? Did they use an interpreter if you need one? Do they ask if you have questions? Did they spend enough time with you?* |
| “I got a very clear explanation.”  “At first we would have longer interviews with the doctors, who would explain very patiently, slowly, and kindly to have us understand.”  “Every time we go to be seen, they explain a little more and that’s the only thing I know.” |
| *Prompt 3: Are there barriers (such as language) to your visits or understanding? What might help increase your understanding?* |
| “No because when we go they have someone who explains those things to us.”  “There is someone in the room to translate.”  “Maybe same language would be more helpful but I don’t really think it is needed.”  “I would like for the doctors to explain better to the child, the patient. It’s hard to get them to understand.”  “We are just pretty ignorant about these conditions of the eye or health in general, so the more information we can get the better.”  “For me, I would like them to describe certain terms a little more, if I don’t understand I want to be able to ask.”  “The first doctor we went to just told us she needed glasses but it was more serious, I wish I knew earlier.”  “My daughter is 16 and is the one that talks to the doctor more directly, which I don’t have a problem with due to my limited English.”  “In general, they should explain everything as early as possible. We didn’t have this information in the beginning when things started, all we were told is she would need glasses. When we came here, they told us what we needed to know, but we didn’t know about it for a long time before that. And I feel I am still ignorant about it.”  “They provide interpreters and explain it well. Maybe it’s just us that we need to do more research.”  “I don’t ask questions. I trust the doctor and just listen to what they say.”  “They told me about eye drops but they had a cost so I didn’t get them.”  “Maybe a written paper with things in my language would help.” |
